# Supplementary material
Source: Springer Nature journal article supplement (https://www.springermedizin.de/resource/supplementary/12933_2010_274_MOESM3_ESM.pdf/9539992)

Overlay  
GFP / MAC-3-TRITC

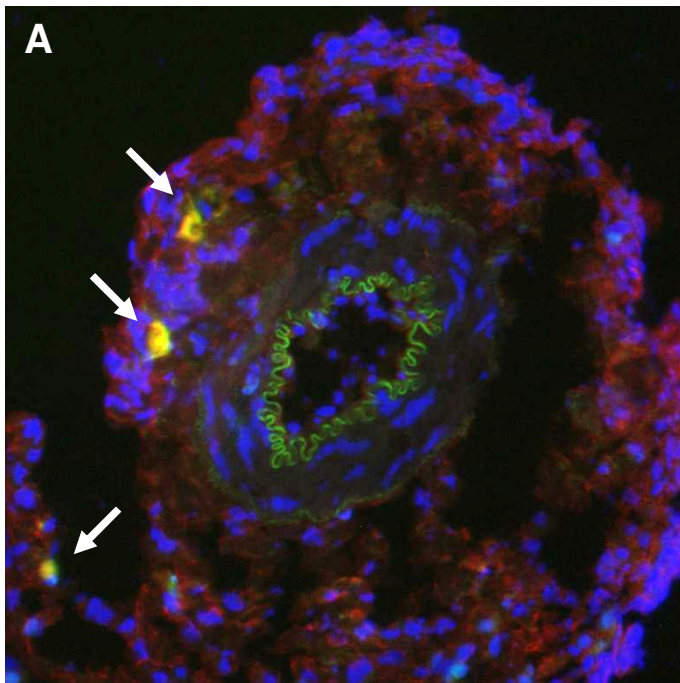

MAC-3-TRITC  
SPC culture

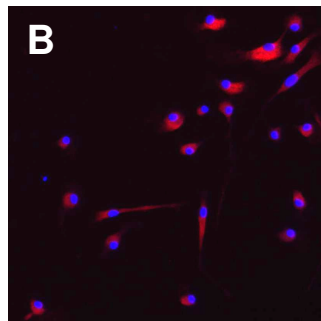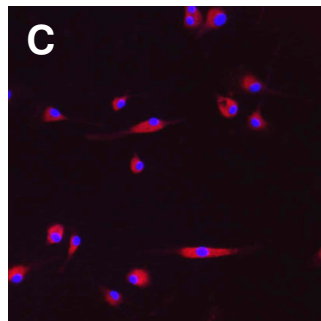

Supplement: MOESM3 [file 9539992]
